# Supplementary material
Source: Springer Nature journal article supplement (https://www.springermedizin.de/resource/supplementary/12877_2004_29_MOESM1_ESM.pdf/9441032)

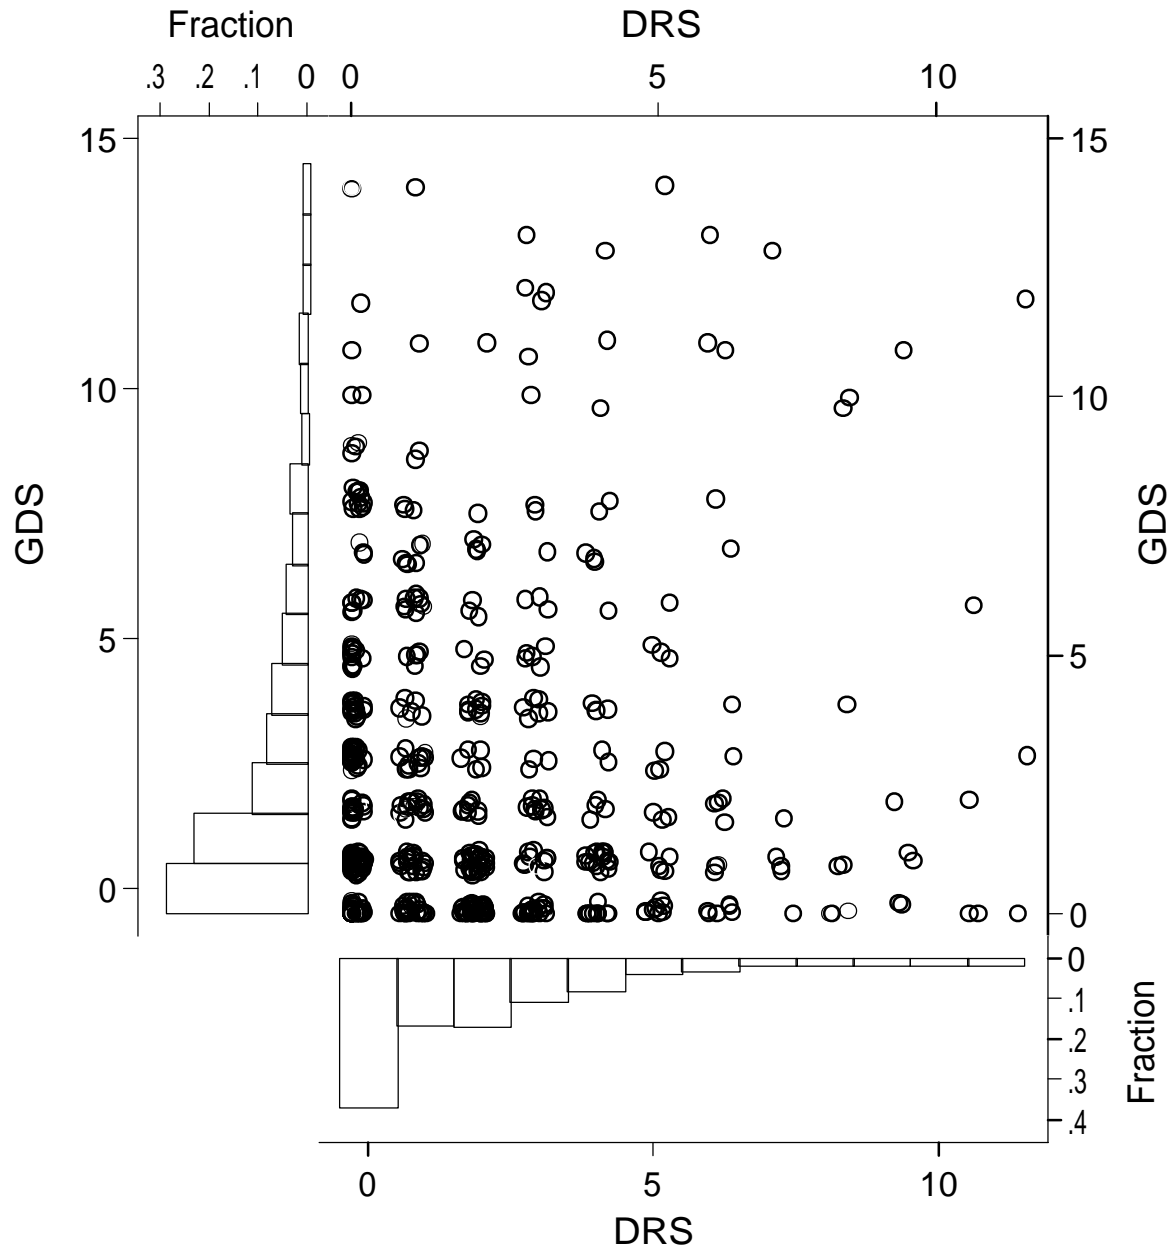

Supplement: MOESM1 [file 9441032]
